# Supplementary material for: Structurally simple phenanthroimidazole-based bipolar hosts for high-performance green and red electroluminescent devices
Source: Royal Society of Chemistry journal article supplement (doi:10.1039/c5ra14570h), 2015-01-01
Supplement: c5ra14570h1.pdf [file c5ra14570h1.pdf]

# Supporting Information

## **Structurally simple phenanthroimidazole-based bipolar hosts for high-performance green and red electroluminescent devices**

Kai Wang, Shipan Wang, Jinbei Wei, Yang Miao, Zhenyu Zhang, Zuolun Zhang,\* Yu Liu and Yue Wang

State Key Laboratory of Supramolecular Structure and Materials, College of Chemistry, Jilin University,

Changchun 130012, P. R. China

E-mail: zuolunzhang@jlu.edu.cn

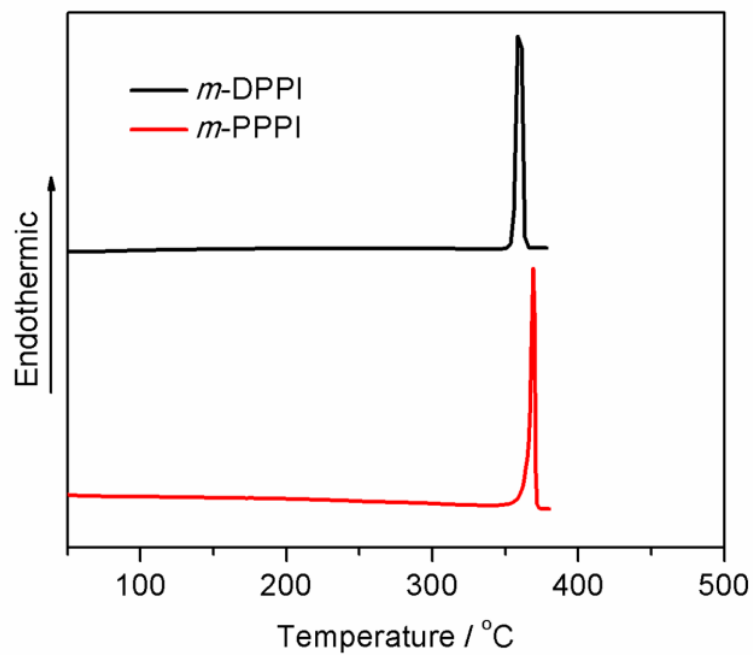

**Fig. S1** DSC curves of *m*-DPPI and *m*-PPPI.

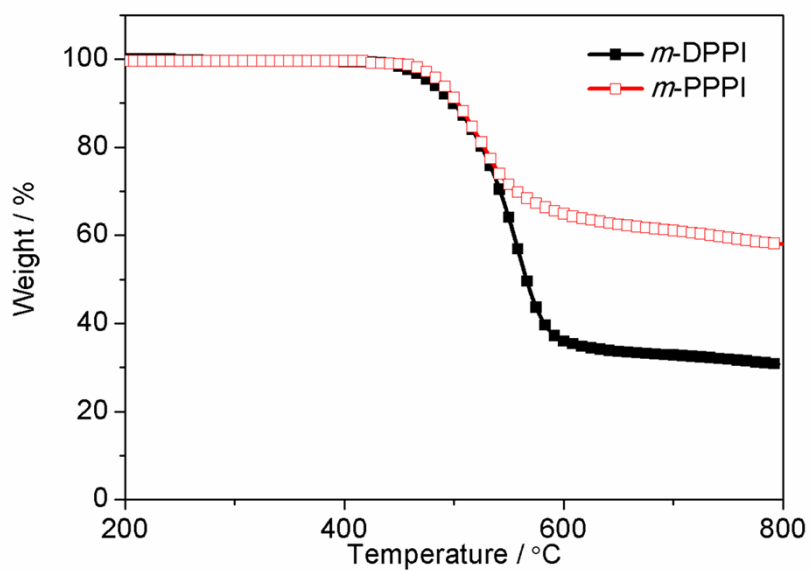

**Fig. S2** TGA curves of *m*-DPPI and *m*-PPPI.

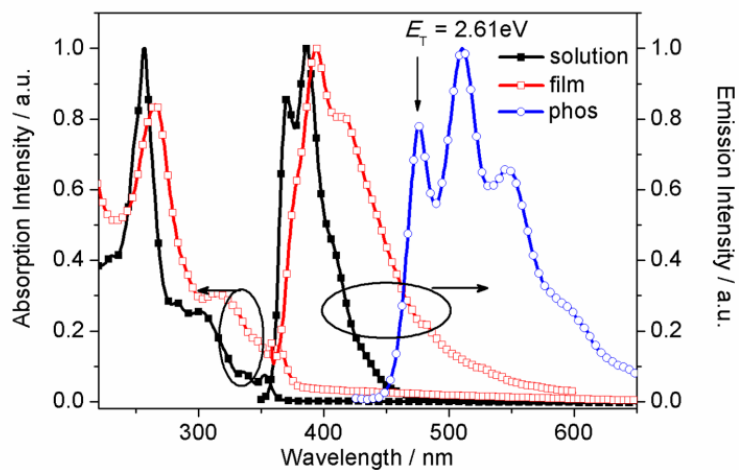

**Fig. S3** Room-temperature UV-vis absorption and emission spectra of PPI in  $\text{CH}_2\text{Cl}_2$  and in neat films, as well as the phosphorescence spectra of PPI in 2-MeTHF ( $10^{-5}$  M) at 77K.

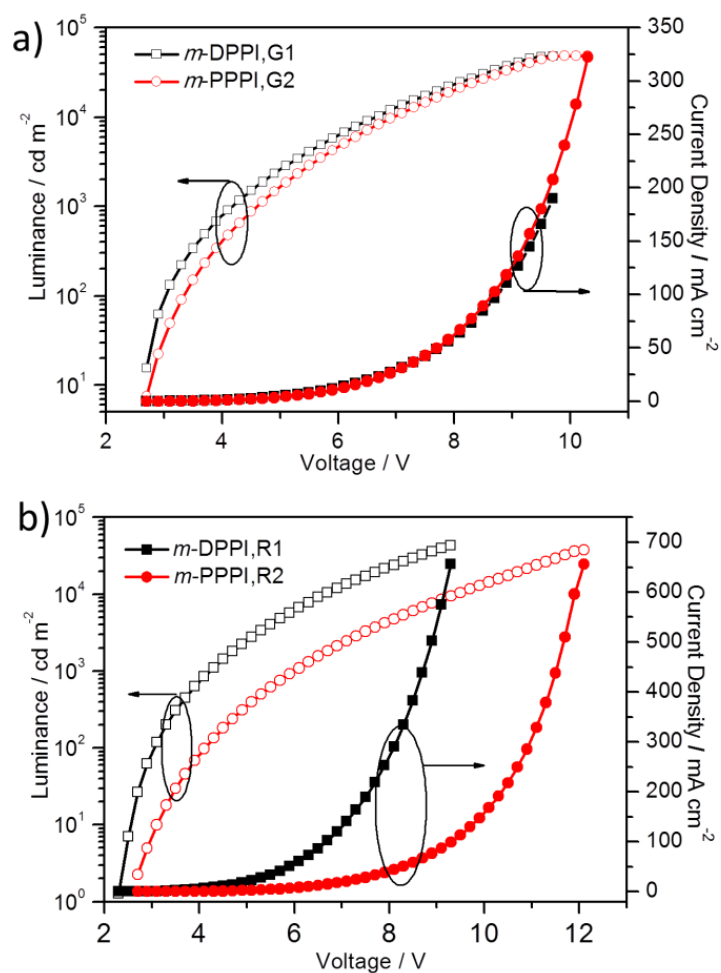

**Fig. S4** Current density–voltage–luminance (J–V–L) characteristics of the green (a) and red (b) OLEDs.

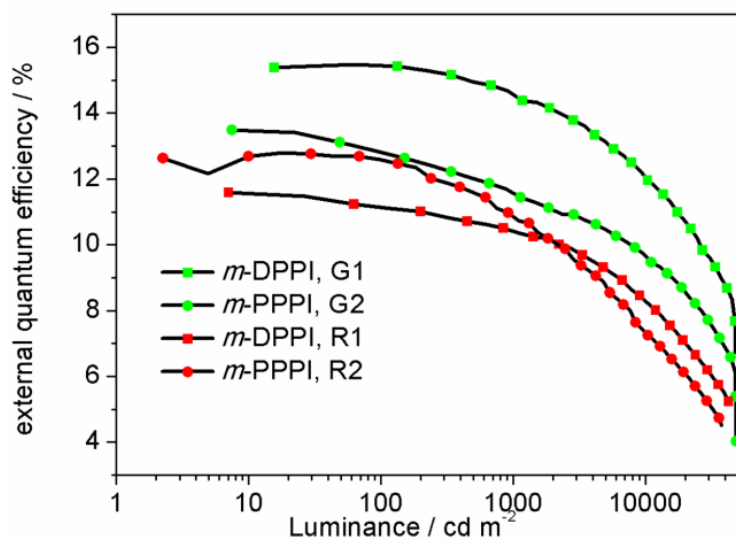

**Fig. S5** External quantum efficiency versus luminance curves of the devices.

### Crystal Data of *m*-DPPI

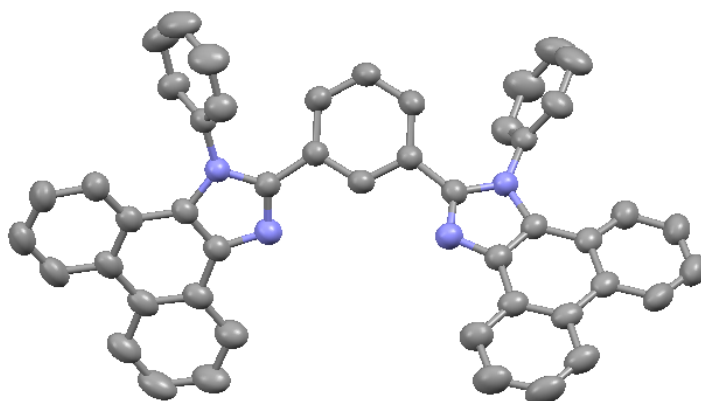

$C_{48}H_{30}N_4$ ,  $M = 662.76$ , Orthorhombic,  $Pbcn$ ,  $a = 24.996(5) \text{ \AA}$ ,  $b = 9.4441(19) \text{ \AA}$ ,  $c = 14.619(3) \text{ \AA}$ ,  $\alpha = 90^\circ$ ,  $\beta = 90^\circ$ ,  $\gamma = 90^\circ$ ,  $V = 3450.9(12) \text{ \AA}^3$ ,  $T = 293(2) \text{ K}$ ,  $Z = 4$ ,  $\mu (\text{Mo K}\alpha) = 0.075 \text{ mm}^{-1}$ , 29007 reflections measured, 3915 unique.

The final  $wR_2$  was 0.1213 (all data) and  $R_1$  was 0.0462 ( $I \geq 2\sigma(I)$ ).
